# Supplementary material for: Heterozygous deletion of exon 17 of the Kit gene impairs mouse spermatogenesis by attenuating MAPK-ERK signaling
Source: Springer Nature journal article supplement (doi:10.1186/s40659-025-00609-2), 2025-05-13
Supplement: MOESM2 [file 40659_2025_609_MOESM2_ESM.pdf]

This document certifies that the manuscript

**Heterozygous deletion of exon 17 of the Kit gene impairs mouse spermatogenesis by attenuating MAPK-ERK signaling**

prepared by the authors

**Siyuan Lin, Min Yang, Weipeng Zhu, Changqi Yang, Yaosheng Chen, Peiqing Cong, Xiaohong Liu, Zuyong He**

was edited for proper English language, grammar, punctuation, spelling, and overall style by one or more of the highly qualified English speaking editors at AJE.

This certificate was issued on **March 5, 2025** and may be verified on the [AJE website](#) using the verification code **73FE-9066-E233-EE18-95D8**.

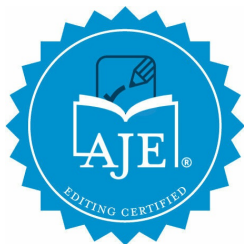

Neither the research content nor the authors' intentions were altered in any way during the editing process. Documents receiving this certification should be English-ready for publication; however, the author has the ability to accept or reject our suggestions and changes. To verify the final AJE edited version, please visit our verification page at [aje.com/certificate](#). If you have any questions or concerns about this edited document, please contact AJE at [support@aje.com](mailto:support@aje.com).
